# Supplementary material for: Fully dispersed Pt entities on nano-Au dramatically enhance the activity of gold for chemoselective hydrogenation catalysis
Source: Royal Society of Chemistry journal article supplement (doi:10.1039/c0cc03790g), 2010-11-20
Supplement: c0cc03790g.pdf [file c0cc03790g.pdf]

## **Supplementary Information**

### **Fully Dispersed Pt Entities on Nano-Au Dramatically Enhance the Activity of Gold for Chemoselective Hydrogenation Catalysis**

**Yong-Chun Hong, Ke-Qiang Sun, Gui-Rong Zhang, Ru-Yi Zhong and Bo-Qing Xu\***

*Innovative Catalysis Program, Key Lab of Organic Optoelectronics & Molecular Engineering,  
Department of Chemistry, Tsinghua University, Beijing, 100084, China.*

***Preparation of Pt<sub>m</sub>^Au/SiO<sub>2</sub> catalysts:***

PVA-stabilized Au nanoparticles with an averaged size of  $3.0 \pm 0.6$  nm were prepared by reduction of AuCl<sub>4</sub><sup>-</sup> (HAuCl<sub>4</sub>·4H<sub>2</sub>O, Acros) with NaBH<sub>4</sub> (99%, Sigma Aldrich) in aqueous solutions containing polyvinyl alcohol (PVA, typical repeating units 1750, AR, Beijing Chemical Reagent Company). In a typical procedure, 1 mL of 0.05 M HAuCl<sub>4</sub> solution was diluted with 130 mL of deionized water and then mixed with 50 mL of PVA solution (0.2 mg mL<sup>-1</sup>) and 20 mL of ethanol. The solution was kept under vigorous stirring for 2 h, and then 5 mL of fresh 0.1 M NaBH<sub>4</sub> solution was added dropwise. The resulted wine-colored solution was kept under vigorous stirring for 2 h to ensure the formation of Au nanoparticles.

Pt<sub>m</sub>^Au nanoparticles were obtained via a successive hydrogen reduction of PtCl<sub>6</sub><sup>2-</sup> (K<sub>2</sub>PtCl<sub>6</sub>, AR, Beijing Chemical Reagent Company) onto as-prepared Au nanoparticles. In the case of Pt<sub>0.05</sub>^Au nanoparticles, 50 mL of 0.05 mM K<sub>2</sub>PtCl<sub>6</sub> solution (2.5 μmol of Pt) was mixed with the as-prepared Au colloid (50 μmol of Au). The resulted solution was kept under vigorous stirring for 2 h and then transferred into a bubbling tube. After purged with N<sub>2</sub> for 30 min, the solution was bubbled with H<sub>2</sub> for 2 h and then kept airtight for 48 h at room temperature to obtain Pt<sub>m</sub>^Au nanoparticles.

SiO<sub>2</sub> (Aerosil 90, Degussa) with a BET surface area of 90 m<sup>2</sup>/g was used as an inert support for the Pt<sub>m</sub>^Au nanoparticles. In a typical immobilization procedure, 1 g of SiO<sub>2</sub> was added to the as-prepared Pt<sub>m</sub>^Au colloid (50 μmol of Au) under vigorous stirring, then pH of the suspension (initial pH = *ca.* 7.6) was adjusted to 0.5 by addition of HNO<sub>3</sub> solutions of different concentrations (0.2, 1.0 and 3.2 M, used in different stage to avoid any rapid drop in

pH). The resulted suspensions were vigorously stirred for 2h and then filtrated. The solids were extensively washed with deionized water (500 mL for each time) for 3 times and then dried at 110 °C.

***Characterizations:***

Transmission electron microscopy (TEM) measurements were performed on a Tecnai G2 F20 U-Twin system operating at 200 kV. Inductively coupled plasma atomic emission spectrometry (ICP-AES), X-Ray photoelectron spectroscopy (XPS), UV-vis spectroscopy and electrochemical measurements were performed following the same procedure detailed in Ref. 8 and 9.

***Catalytic testing:***

Hydrogenation reactions were performed on a high pressure reaction set equipped with a Parr 4843 controller and a 25 mL Hastelloy autoclave. In a typical procedure, the autoclave was first loaded with 5 mL of toluene (AR, Beijing Chemical Reagent Company), certain amount of catalyst and substrate, and then purged with H<sub>2</sub> (0.8 MPa, in excess) for 6 times. After pressurized to the desired H<sub>2</sub> pressure at room temperature, the autoclave was heated to the reaction temperature (150 °C). Zero reaction time was taken as soon as the reaction temperature was reached and mechanical stirring (900 rpm) was started then.

Transfer hydrogenation reactions were performed on a similar high pressure reaction set equipped with a Parr 4843 controller and a 50 mL Hastelloy autoclave. In a typical procedure, the autoclave was first loaded with 10 mL of benzyl alcohol (AR, Beijing Chemical Reagent Company), 50 mg of catalyst and 0.5 mL of cinnamaldehyde (4 mmol), and then purged with

N<sub>2</sub> (0.8 MPa, in excess) for 6 times. Zero reaction time was taken as soon as the autoclave was heated to the reaction temperature (150 °C), and mechanical stirring (900 rpm) was started then.

After each reaction, the autoclave was quenched by ice-water bath. The reacted liquid was separated with catalyst by filtration and then analyzed by an HP-7890A gas chromatograph equipped with a Shimadzu HiCap CBP20 capillary column and a flame ionization detector (FID) or an HP-4890 gas chromatograph equipped with an HP-5 capillary column and an FID. Identification of products was performed on an HP-6890 gas chromatograph equipped with an HP-5 capillary column and an HP-5973 mass selective detector (MSD).

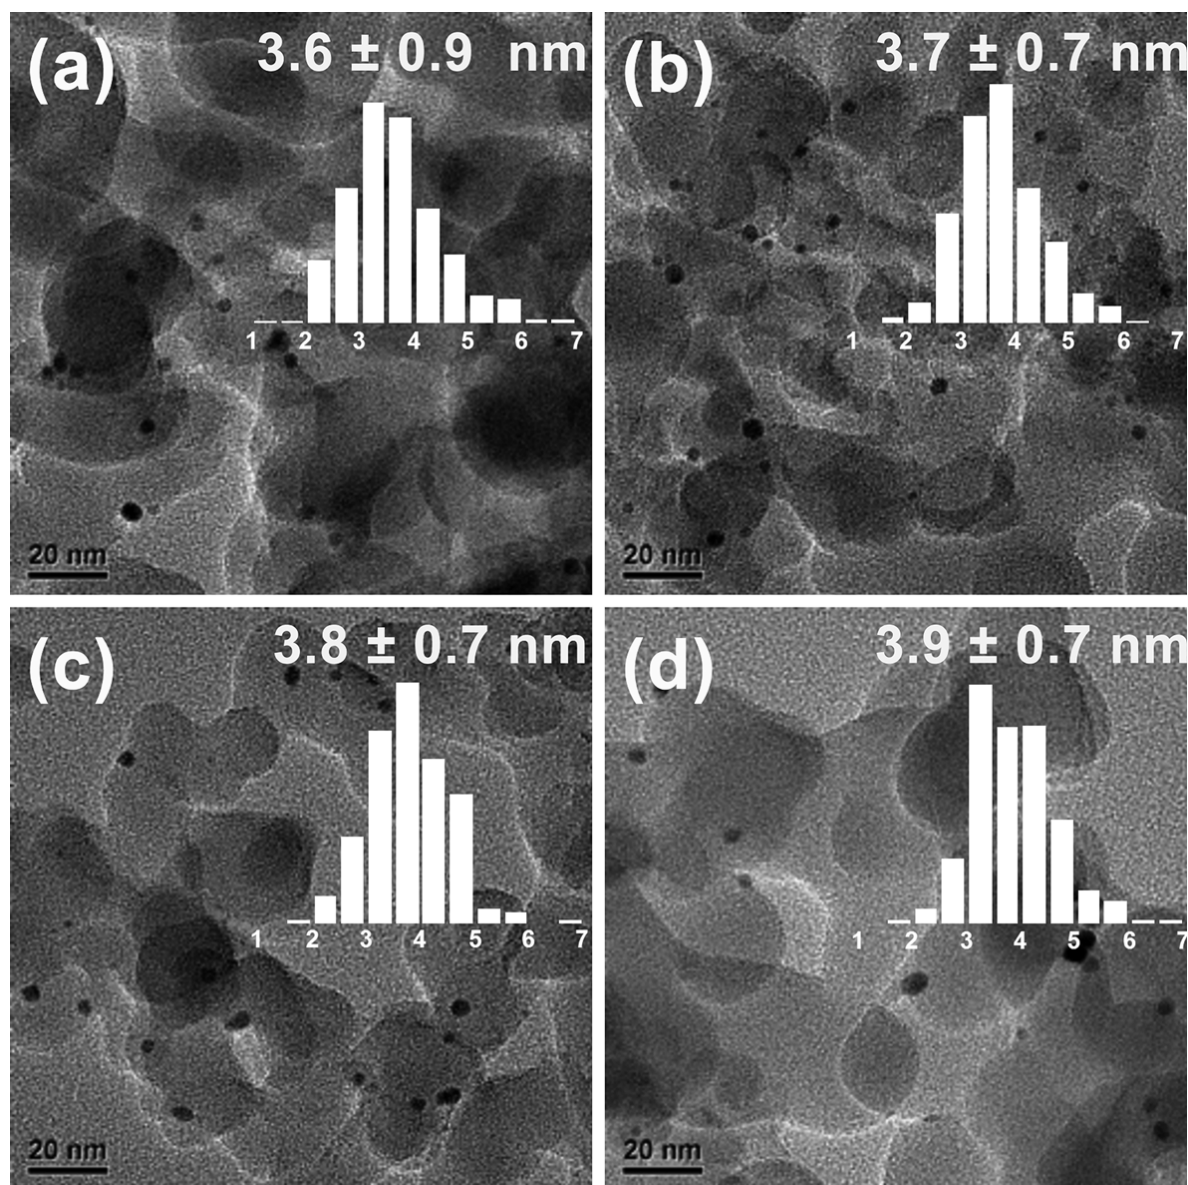

**Fig. S1** Representative TEM images of  $\text{Pt}_m^{\text{Au}}/\text{SiO}_2$  samples: (a)  $m = 0$ ; (b)  $m = 0.01$ ; (c)  $m = 0.05$ ; (d)  $m = 0.1$ ; the accompanying bar graphs give the size distributions of the immobilized  $\text{Pt}_m^{\text{Au}}$  nanoparticles.

**Table S1 Detailed catalytic data for CAL hydrogenation <sup>a</sup>**

Reaction scheme: CAL (cinnamaldehyde) + 1.0 MPa H<sub>2</sub>, 150 °C, Pt<sub>m</sub><sup>Au</sup>/SiO<sub>2</sub> → HCAL (cinnamyl aldehyde) + COL (cinnamyl alcohol) + HCOL (cinnamyl diol)

| Catalyst                                            | Rxn. time<br>(min) | CAL conv.<br>(%) | Sel. (%) |     |      |
|-----------------------------------------------------|--------------------|------------------|----------|-----|------|
|                                                     |                    |                  | HCAL     | COL | HCOL |
| Au/SiO <sub>2</sub>                                 | 720                | 11               | 73       | 23  | 4    |
| Pt <sub>0.005</sub> <sup>Au</sup> /SiO <sub>2</sub> | 240                | 20               | 77       | 15  | 8    |
| Pt <sub>0.01</sub> <sup>Au</sup> /SiO <sub>2</sub>  | 240                | 19               | 79       | 17  | 4    |
| Pt <sub>0.05</sub> <sup>Au</sup> /SiO <sub>2</sub>  | 15                 | 15               | 72       | 19  | 9    |
| Pt <sub>0.1</sub> <sup>Au</sup> /SiO <sub>2</sub>   | 15                 | 16               | 71       | 21  | 8    |
| Pt <sub>0.2</sub> <sup>Au</sup> /SiO <sub>2</sub>   | 15                 | 15               | 75       | 19  | 6    |
| Pt <sub>0.05</sub> <sup>Au</sup> /SiO <sub>2</sub>  | 240                | 63               | 78       | 10  | 12   |
| Pt <sub>0.05</sub> <sup>Au</sup> /SiO <sub>2</sub>  | 120                | 44               | 78       | 13  | 9    |
| Pt <sub>0.05</sub> <sup>Au</sup> /SiO <sub>2</sub>  | 60                 | 33               | 74       | 18  | 8    |
| Pt <sub>0.05</sub> <sup>Au</sup> /SiO <sub>2</sub>  | 30                 | 23               | 79       | 14  | 7    |
| Pt <sub>0.1</sub> <sup>Au</sup> /SiO <sub>2</sub>   | 120                | 45               | 74       | 15  | 11   |
| Pt <sub>0.1</sub> <sup>Au</sup> /SiO <sub>2</sub>   | 30                 | 23               | 76       | 16  | 8    |
| Pt <sub>0.2</sub> <sup>Au</sup> /SiO <sub>2</sub>   | 240                | 47               | 79       | 11  | 10   |
| Pt <sub>0.2</sub> <sup>Au</sup> /SiO <sub>2</sub>   | 120                | 33               | 78       | 12  | 10   |
| Pt <sub>0.2</sub> <sup>Au</sup> /SiO <sub>2</sub>   | 60                 | 25               | 79       | 12  | 9    |
| Pt <sub>0.2</sub> <sup>Au</sup> /SiO <sub>2</sub>   | 30                 | 21               | 74       | 19  | 7    |

<sup>a</sup> Reaction conditions: 0.5 mL CAL dissolved and 50 mg of catalyst dispersed in 5 mL toluene.

**Table S2 Detailed catalytic data for furfural hydrogenation <sup>a</sup>**

FF  $\xrightarrow[\text{Pt}_m^{\text{Au}}/\text{SiO}_2]{1 \text{ MPa H}_2, 150 \text{ }^\circ\text{C}}$  FA

| Catalyst                                             | Rxn. time<br>(min) | FF conv.<br>(%) | Sel. of FA (%) | MSA <sub>Au</sub><br>(mol/h/g <sub>Au</sub> ) | MSA <sub>Pt</sub><br>(mol/h/g <sub>Pt</sub> ) |
|------------------------------------------------------|--------------------|-----------------|----------------|-----------------------------------------------|-----------------------------------------------|
| SiO <sub>2</sub>                                     | 240                | 0               | -              | -                                             | -                                             |
| Au/SiO <sub>2</sub>                                  | 240                | 1               | > 99           | 0.02                                          |                                               |
| Pt <sub>0.005</sub> <sup>^</sup> Au/SiO <sub>2</sub> | 240                | 4               | > 99           | 0.08                                          | 15.9                                          |
| Pt <sub>0.01</sub> <sup>^</sup> Au/SiO <sub>2</sub>  | 240                | 5               | > 99           | 0.10                                          | 9.94                                          |
| Pt <sub>0.05</sub> <sup>^</sup> Au/SiO <sub>2</sub>  | 240                | 10              | > 99           | 0.20                                          | 3.98                                          |
| Pt <sub>0.1</sub> <sup>^</sup> Au/SiO <sub>2</sub>   | 240                | 18              | > 99           | 0.36                                          | 3.58                                          |
| Pt <sub>0.2</sub> <sup>^</sup> Au/SiO <sub>2</sub>   | 240                | 11              | > 99           | 0.22                                          | 1.09                                          |
| 5 wt% Pt/SiO <sub>2</sub>                            | 60                 | 6               | > 99           | -                                             | 0.10                                          |

<sup>a</sup> Reaction conditions: 0.33 mL furfural dissolved and 50 mg of catalyst dispersed in 5 mL toluene; stirring speed = 900 rpm

**Table S3 Detailed catalytic data for CAL transfer hydrogenation <sup>a</sup>**

| Catalyst                                             | CAL conv. (%) | BAL/CAL <sub>con.</sub> <sup>b</sup> | Sel. (%) |     |      |  |
|------------------------------------------------------|---------------|--------------------------------------|----------|-----|------|--|
|                                                      |               |                                      | HCOL     | COL | HCOL |  |
| SiO <sub>2</sub>                                     | 0             | -                                    | -        | -   | -    |  |
| Au/SiO <sub>2</sub>                                  | 7             | 1.3                                  | 33       | 63  | 4    |  |
| Pt <sub>0.005</sub> <sup>^</sup> Au/SiO <sub>2</sub> | 14            | 1.2                                  | 67       | 25  | 9    |  |
| Pt <sub>0.05</sub> <sup>^</sup> Au/SiO <sub>2</sub>  | 12            | 1.2                                  | 66       | 29  | 5    |  |
| Pt <sub>0.2</sub> <sup>^</sup> Au/SiO <sub>2</sub>   | 8             | 1.3                                  | 56       | 38  | 7    |  |

<sup>a</sup> Reaction conditions: 0.5 mL CAL dissolved and 50 mg of catalyst dispersed in 10 mL BOL; rxn. time = 240 min; stirring speed = 900 rpm; <sup>b</sup> Mole ratio of BAL produced and CAL converted, indicating hydrogen produced in BOL dehydrogenation was not fully consumed.
